# Supplementary material for: Volumetric Sex Differences in Hypothalamic Volume and Associated Subunits Revealed by Automated MRI Segmentation
Source: Research Square preprint supplement (doi:10.21203/rs.3.rs-7163918/v1), 2025-10-20
Supplement: Supplementary file 1 [file 6c74d734fa7ebd57254ac8c2.pdf]

# Sex Differences in Hypothalamic Volume and Associated Subunits

An MRI-Based Investigation

## Study Summary

**Purpose:** Investigate sex differences in hypothalamic volume and its subregions.

### Participants:

- 66 Healthy Right-Handed Individuals
- 34 Males, 32 Females (Implicit)
- Mean Age:  $49.42 \pm 12.25$  years

### Methods:

- 3T MRI, 64-channel head coil
- 3D T1-weighted MPRAGE
- Automated segmentation (Deep CNN, FreeSurfer v7.4.1 validated)
- Subunits: a-sHyp, a-iHyp, supTub, infTub, posHyp
- TIV normalization
- MANCOVA analysis

## Sexual Dimorphism

♀ > ♂

Females exhibited **larger adjusted volumes** across nearly all hypothalamic subunits.

MANCOVA: Wilks'  $\Lambda = 0.652$ ,  $F(10,50) = 2.66$ ,  $p = 0.011$ , partial  $\eta^2 = 0.35$

## Age Associations & Other Factors

Age showed modest **POSITIVE** associations with:

- 📈 Right a-iHyp ( $p = 0.042$ )
- 📈 Right a-sHyp ( $p = 0.035$ )
- 📈 Right supTub ( $p = 0.049$ )
- 📈 Whole Right Hypothalamus ( $p = 0.022$ )

## Not Significantly Associated ( $p > 0.05$ ):

- Body Mass Index (BMI)
- Education
- Handedness
- Sex  $\times$  Handedness Interactions

## Hypothalamic Subunits

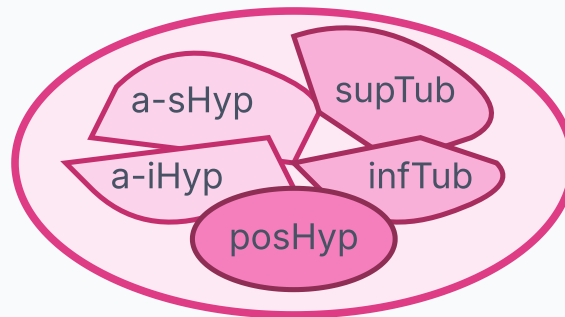

Simplified representation of hypothalamic subregions.

## Conclusions

Females have larger TIV-adjusted hypothalamic volumes across most subunits compared to males. Certain right-sided hypothalamic subregions show positive associations with age. These findings underscore the importance of considering sex as a biological variable in neuroscientific research and clinical contexts related to the hypothalamus.
